# Supplementary material
Source: publisher figshare collection journal article supplement (https://sage.figshare.com/ndownloader/files/12370442)
Supplement: Supplementary file 1 [file 12370442]

## Supplementary material

Table A.1.: Variables, survey questions and coding.

| Variable                             | Source                                                                                                                                                                                                                                            | Coding                                                                         |
|--------------------------------------|---------------------------------------------------------------------------------------------------------------------------------------------------------------------------------------------------------------------------------------------------|--------------------------------------------------------------------------------|
| Partisan responsiveness (ideology)   | ESS: 1) 'Is there a particular political party you feel closer to than all the other parties?'<br>2) Which one?<br>ParlGov: left-right placement of parties                                                                                       | 1 = right-leaning partisan<br>0 = no affiliation<br>-1 = left-leaning partisan |
| Partisan responsiveness (incumbency) | ESS: 1) 'Is there a particular political party you feel closer to than all the other parties?'<br>2) Which one?<br>ParlGov: parties in cabinet                                                                                                    | 1 = incumbent partisan<br>0 = no affiliation<br>-1 = opposition partisan       |
| Left-right self-placement            | ESS: 'In politics people sometimes talk of "left" and "right". Using this card, where would you place yourself on this scale, where 0 means the left and 10 means the right?'                                                                     | 0 (left) – 10 (right)                                                          |
| Economic evaluations                 | ESS: 'On the whole how satisfied are you with the present state of the economy in [country]?'                                                                                                                                                     | 0 (extremely dissatisfied) – 10 (extremely satisfied)                          |
| Unemployment rate                    | Eurostat: official country-level unemployment rates                                                                                                                                                                                               | 2.5 – 30.9                                                                     |
| Leadership evaluations               | ESS: 'Using this card, please tell me on a score of 0-10 how much you personally trust each of the institutions I read out. 0 means you do not trust an institution at all, and 10 means you have complete trust. Firstly...<br>... politicians?' | 0 (no trust at all) – 10 (complete trust)                                      |
| Trust in parliament                  | ESS: 'Using this card, please tell me on a score of 0-10 how much you personally trust each of the institutions I read out. 0 means you do not trust an institution at all, and 10 means you have complete trust. Firstly...                      | 0 (no trust at all) – 10 (complete trust)                                      |

|                    |                                                                                                                                                                                      |                                                                  |
|--------------------|--------------------------------------------------------------------------------------------------------------------------------------------------------------------------------------|------------------------------------------------------------------|
|                    | ... [country]'s parliament?                                                                                                                                                          |                                                                  |
| Social class       | ESS: Oesch's (2006a, 2006b) measure                                                                                                                                                  | 1 (low-skilled working class) – 5 (upper and upper-middle class) |
| Age                | ESS: age of respondent                                                                                                                                                               | 13 – 123                                                         |
| Years in education | ESS: 'About how many years of education have you completed, whether full-time or part-time? Please report these in full-time equivalents and include compulsory years of schooling.' | 1 – 56                                                           |
| Unemployed         | ESS: 'Using this card, which of these descriptions applies to what you have been doing for the last 7 days?<br>Unemployed and actively looking for a job'                            | 1 = yes<br>0 = no                                                |
| Minority           | ESS: 'Do you belong to a minority ethnic group in [country]?'                                                                                                                        | 1 = yes<br>0 = no                                                |
| Female             | ESS: respondent's gender                                                                                                                                                             | 1 = female<br>0 = male                                           |
| GDP growth rate    | World Bank: Gross Domestic Product in constant 2010 U.S. dollars                                                                                                                     | -5.33 – 12.10                                                    |
| Wave               | ESS: survey wave                                                                                                                                                                     | 1 (2002) – 6 (2012)                                              |
| Postcrash          | Time dummy                                                                                                                                                                           | Wave 5-6 = 1<br>Wave 1-4 = 0                                     |

Figure A.1. Share of partisans over time, ESS 2002-2012; design and population weights applied.

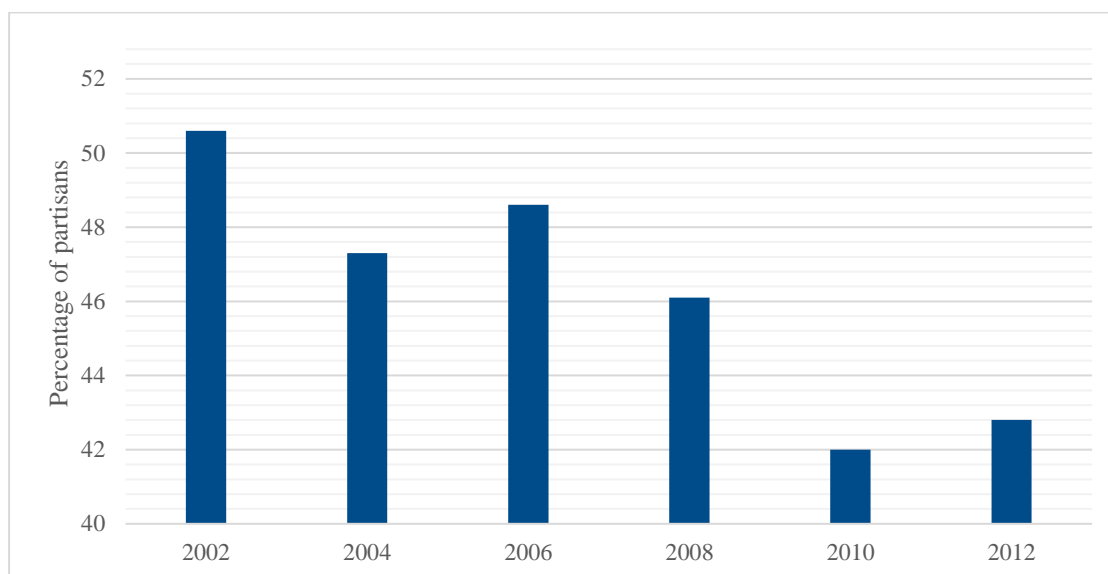

Table A.1. Share of left- and right- leaning incumbent partisans over time; design and population weights applied.

|       | <b>partisans</b>              |                                |
|-------|-------------------------------|--------------------------------|
|       | <i>left-leaning incumbent</i> | <i>right-leaning incumbent</i> |
| 2002  | 10.6% (4482)                  | 11.3% (4765)                   |
| 2004  | 7.9% (3712)                   | 11.7 (5518)                    |
| 2006  | 11.2% (4820)                  | 11.5% (4914)                   |
| 2008  | 8.5% (4835)                   | 11.4% (6483)                   |
| 2010  | 4.5% (2259)                   | 13.4% (6806)                   |
| 2012  | 6.7% (3658)                   | 12.3% (6702)                   |
| Total | 8.1% (23766)                  | 12.0% (35180)                  |
